**Impact of the COVID-19 pandemic on community antibiotic prescribing and stewardship:  
a qualitative interview study with general practitioners in England**

Aleksandra J. Borek,<sup>1\*</sup> Katherine Maitland,<sup>1</sup> Monsey McLeod,<sup>2,3,4</sup> Anne Campbell,<sup>2</sup> Benedict Hayhoe,<sup>5,6</sup> Christopher C. Butler,<sup>1</sup> Liz Morrell,<sup>7</sup> Laurence Roope,<sup>7</sup> Alison Holmes,<sup>2</sup> A. Sarah Walker,<sup>8,9,10</sup> Sarah Tonkin-Crine,<sup>1,8</sup> the STEP-UP study team<sup>†</sup>

1. Nuffield Department of Primary Care Health Sciences, University of Oxford, Oxford, UK
2. National Institute for Health Research (NIHR) Health Protection Research Unit in Healthcare Associated Infections and Antimicrobial Resistance, Imperial College London, London, UK.
3. Centre for Medication Safety and Service Quality, Pharmacy Department, Imperial College Healthcare NHS Trust, London, UK
4. NIHR Imperial Patient Safety Translational Research Centre, Imperial College London, London, UK
5. Department of Primary Care and Public Health, School of Public Health, Imperial College London, London, UK
6. NIHR Applied Research Collaboration Northwest London, London, UK
7. Health Economics Research Centre, Nuffield Department of Population Health, University of Oxford, UK
8. NIHR Health Protection Research Unit in Healthcare Associated Infections and Antimicrobial Resistance, University of Oxford, Oxford, UK
9. NIHR Oxford Biomedical Research Centre, Oxford, UK
10. Nuffield Department of Medicine, University of Oxford, Oxford, UK

\* Correspondence: [Aleksandra.borek@phc.ox.ac.uk](mailto:Aleksandra.borek@phc.ox.ac.uk).

† Members of the STEP-UP study team are listed in the Acknowledgments section.

## Abstract

The COVID-19 pandemic has had a profound impact on the delivery of primary care services. We aimed to identify general practitioners' (GPs') perceptions and experiences of how the COVID-19 pandemic influenced antibiotic prescribing and antimicrobial stewardship (AMS) in general practice in England. Twenty-four semi-structured interviews were conducted with 18 GPs at two time-points: autumn 2020 (14 interviews) and spring 2021 (10 interviews). Interviews were audio-recorded, transcribed and analysed thematically, taking a longitudinal approach. Participants reported a lower threshold for antibiotic prescribing (and fewer consultations) for respiratory infections and COVID-19 symptoms early in the pandemic, then returning to more usual (pre-pandemic) prescribing. They perceived less impact on antibiotic prescribing for urinary and skin infections. Participants perceived the changing ways of working and consulting (e.g., proportions of remote and in-person consultations), and the changing patient presentations and GP workload as influencing the fluctuations in antibiotic prescribing. This was compounded by decreased engagement with, and

priority of, AMS due to COVID-19-related urgent priorities. Re-engagement with AMS is needed, e.g., through reviving antibiotic prescribing feedback and targets/incentives. While the pandemic disrupted the usual ways of working, it also produced opportunities, e.g., for re-organising ways of managing infections and AMS in the future.

**Keywords:** antibiotics, antimicrobial stewardship, general practice, primary care, COVID-19, qualitative

## 1. Introduction

Antimicrobial stewardship (AMS) and optimising antibiotic prescribing and use are a public health priority to mitigate the development and impact of antimicrobial resistance (1,2). Although antibiotic prescribing in general practice and community settings has steadily decreased since 2014, antibiotic-resistant bloodstream infections have increased by 32% since 2015 (3). Continued AMS efforts are needed as antimicrobial resistance is quickly becoming another health emergency.

The emergence of severe acute respiratory syndrome coronavirus 2 (SARS-CoV-2) and the resulting COVID-19 pandemic has posed new challenges to assessing and treating patients with respiratory tract infections (RTIs). International studies have shown that the majority of patients admitted to hospitals with COVID-19 were prescribed empirical antibiotics despite low prevalence of bacterial co-infection and regardless of illness severity (4–8). A UK-wide survey of hospital pharmacists (members of AMS teams or AMS leads) in June 2020 found that most respondents reported a reduction in AMS activity and a negative impact of the pandemic on AMS (9). Consequently, concerns were raised about the impact of COVID-19 on antimicrobial prescribing, AMS and future consequences for antimicrobial resistance, health and the environment, with calls to keep AMS as a priority (10–17).

Studies from primary care in England have shown an overall decrease in antibiotic prescribing during 2020 compared to pre-pandemic (18–23); with similar trends identified in Scotland (24), Northern Ireland (25) and other countries (26–29). However, one study of UK data noted an initial increase in antibiotic prescribing in March 2020 before prescribing levels dropped below those expected (with the lowest rate in May) (20). Similarly, in Scotland the number of antibiotic prescriptions was 44% higher in the week of 22 March 2020 than in a corresponding week in 2019, followed by lower than expected prescribing during the national lockdown in April and May 2020 (24). Moreover, one study showed that although antibiotic prescribing decreased between April and August 2020 by 15.5% compared to a similar period in 2019, the number of prescriptions was actually 6.7% higher than expected when fewer (-50% in-person and -20.8% all types of) appointments were taken into account (18). This might suggest that suboptimal prescribing for patients unlikely to benefit from antibiotics persists and may have increased during the pandemic; alternatively, patients' threshold for consulting might have increased and more patients required antibiotics. Different factors were proposed as potentially influencing changes in antibiotic prescribing during the pandemic, e.g., fewer face-to-face consultations, more remote consultations, and lower infection transmission due to public health measures (e.g., social distancing) (13,14,18). However, there is little empirical evidence regarding these factors and prescribers' own experiences – better understanding of antibiotic prescribing and AMS during the pandemic may help with AMS.

The aim of this study was to explore general practitioners' (GPs) views on, and experiences of, the impact of the COVID-19 pandemic on antibiotic prescribing and AMS in English general practice.

## 2. Methods

This was a qualitative interview study as qualitative methodology is best suited to explore the experiences of the target group and the question of *why* changes were perceived to occur. We took a longitudinal approach to data collection (two time-points) and a thematic and longitudinal approach to analysis. We followed the Standards for Reporting Qualitative Research (30).

### *Study participants*

We used a convenience approach to recruitment and sampling. Firstly, to quickly identify participants, we included GPs participating in the on-going study on implementing evidence-based AMS strategies (the STEP-UP study (31)). Then, we recruited additional GPs through the local Clinical Research Network. Participants were from the West Midlands, and Thames Valley and South Midlands areas in England. All participants provided informed consent verbally and written records of consent were made. Participation was reimbursed.

### *Data collection*

Semi-structured interviews were conducted by telephone or video calls (depending on participants' preferences) by an experienced qualitative, non-clinical researcher (AB). In order to capture potential changes over time, we took a longitudinal approach (cross-sectional type, as described in (32)), with interviews conducted at two time-points: (i) autumn (late October to early December) 2020, and (ii) spring (late April to early June) 2021. Three interview guides were used (Supplementary Material 1): (i) for GPs in the STEP-UP study in autumn 2020 (with questions about the STEP-UP AMS initiatives and the impact of COVID-19); (ii) for additional GPs in autumn 2020 (about the impact of COVID-19 on antibiotic prescribing and AMS since the start of the pandemic); and (iii) for interviews in spring 2021 (about the impact of COVID-19 on antibiotic prescribing and AMS during the year of the pandemic, and future priorities and plans). The interviews were audio-recorded, transcribed verbatim, and the transcripts were checked and anonymised.

### *Data analysis*

We took a longitudinal approach to analysis, with the whole sample analysed together with attention to changes and consistencies over time (32). Notes were taken during, and summaries were made following, each interview; they helped with data familiarisation and initial ideas about emerging findings. All transcripts were uploaded to the qualitative data management software (NVivo, v.12, QRS International) and analysed thematically (taking an inductive and realist/essentialist approach) (33). Two researchers (AB and KM) initially independently, inductively coded four transcripts (two each from autumn and spring), and compared and integrated their codes. Using the notes from all interviews and team discussions, higher-level categories and themes were identified, resulting in a hierarchical coding framework. The coding framework was used to code the remaining transcripts (KM coded 15, AB 12 transcripts), while adding codes to capture new details/data. All coding was reviewed for consistency. Detailed notes ('audit trail') and a team-based approach ('researcher triangulation') were two main ways to ensure trustworthiness of the analysis.

## **3. Results**

Twenty-four interviews were conducted with 18 GPs, lasting on average 36 (18-54) minutes. In autumn 2020 there were 14 interviews (eight GPs were from the STEP-UP study and six were additionally recruited); in spring 2021 there were 10 interviews (including the same six additional GPs from autumn) after which we stopped recruitment as we considered the data sufficient to answer the research question.

Below we present the findings, supported by empirical data (quotes). Additional quotes are in Supplementary Material 2. We first describe how the COVID-19 pandemic was perceived to impact on antibiotic prescribing, and then the perceived reasons for these impacts.

### *Fluctuations in antibiotic prescribing during COVID-19*

Participants reported that their 'threshold' for antibiotic prescribing for RTIs and COVID-19 symptoms was lower at the start of the COVID-19 pandemic compared to pre-pandemic, i.e. they used antibiotics more '*indiscriminately*' and their likelihood of prescribing empirical antibiotics increased. This was perceived to be influenced by the emergency situation and related factors (described in the following sections).

*Right at the beginning, when COVID first struck, (...) we were treating a lot of chest infections virtually which sounds and goes against everything that we've ever been trained to do but we were told we absolutely mustn't spread COVID, therefore we must keep our distance, that was when PPE was in very short supply. And talking to my colleagues about it, we certainly were prescribing more antibiotics. [GP02 October 2020]*

Over time and as the situation changed, participants described a gradual return to a more 'normal' (i.e. pre-pandemic) approach to antibiotic prescribing.

*As the pandemic has moved on, we've gone a little bit more back to normal, I suppose, being more strict, in that we would expect patients to come in if there is a need for an antibiotic (...) it's [antibiotic prescribing] probably gone back down to a more normal level. [GP14 May 2021]*

However, there was ambiguity over how practices' antibiotic prescribing rates had changed. Almost all participants had not seen the prescribing data in 2020. Some guessed that the overall number of antibiotics prescribed might be higher due to the lower threshold for prescribing; others thought that it might be lower as a result of fewer consultations for RTIs.

Finally, most participants reported that antibiotic prescribing for urinary tract infections (UTIs) and skin infections was less affected by COVID-19 because they were seen as more easily managed remotely than RTIs. For UTIs, most participants described deciding about antibiotics based on reported symptoms (according to algorithms/guidelines) and/or urine samples dropped off at practices with '*minimal contact*'; some referred to being used to (or moving towards) prescribing for uncomplicated UTIs remotely already before the pandemic. For skin infections, they reported using photos or videos of the affected areas to help the assessment. Only a few participants thought that they were still more likely to prescribe antibiotics for these conditions in remote consultations than face-to-face.

*If people meet the number of symptoms threshold that's set in the [local] guidance, we would just prescribe for them. Most UTIs have generally been dealt with remotely anyway (...) that's probably never really changed. [GP12 May 2021]*

*Skin infections, because the patient can now send photos of their skin lesion, COVID or no COVID that was happening anyway. Those are quite easy to diagnose remotely. [GP17 June 2021]*

The fluctuations in antibiotic prescribing (mostly for RTIs) were influenced by the factors described below.

### *Changing ways of working and consulting*

Participants described the changes in their ways of working and consulting, triggered by the pandemic, as a major influence on their approach to antibiotic prescribing. Initially in the pandemic, to minimise face-to-face contact, participants started conducting almost all consultations remotely (mostly by telephone). Being unable to examine patients with RTI symptoms in person meant that clinical decisions were more difficult and felt more risky, and made GPs more likely to prescribe antibiotics to ‘cover every eventuality’. Participants interviewed in autumn 2020 wanted to return to in-person contact and examination.

*I do feel that we probably have prescribed more than we normally would, because of the, especially at the beginning - in March, April, May, the lack of face-to-face consultations, or moving everything online. (...) if someone said they'd got a sore ear, and you can't look at the ear, then you're more likely to prescribe something, more likely than not, antibiotics. So that's just one example of why I think we probably have "overprescribed" antibiotics more than usual. [GP10 November 2020]*

*What we absolutely need to do, as clinicians, is get our hands on the patients. It feels very wrong prescribing without actually listening to somebody's chest. (...) so this is March, April, to really cover ourselves and cover the patient and make sure we'd covered every eventuality (...) we would be prescribing more readily than we would have before. [GP02 October 2020]*

Most participants described also how communicating with patients, especially when not prescribing antibiotics, was more difficult and took longer in remote consultations because it required more detailed history-taking and safety-netting.

*...we're probably spending more time safety-netting than we used to because we haven't laid our eyes on [patients] necessarily. So it's more difficult to satisfy ourselves as clinicians that they don't need antibiotics just based on the history. (...) Whereas in the past you just look at their ear and get all the information (...) Now you're having to ask 20 questions to get the same information. [GP06 November 2020]*

*If you've looked in their ear, looked in their throat, listened to their chest, (...) and you can go through all the negative findings and say, look this is why I think it's a viral infection. That conversation is a little bit more difficult if you haven't seen them, and then they get that impression that, well you're guessing at what's going on. [GP18 June 2021]*

Participants described introducing more face-to-face appointments since summer 2020, and by spring 2021 used a mix of remote and in-person consultations; for example, assessing the patient remotely and then making a decision about whether to see the patient in-person. This helped return to more ‘normal’ antibiotic prescribing as they were less dependent on prescribing antibiotics to manage uncertainty and risk.

*...the number of face-to-face consultations has definitely increased from the first wave. (...)  
...we are examining patients face-to-face when they need to be examined, like their ears and  
their throat and their chest etc., there should be far fewer so called inappropriate antibiotic  
prescribing... [GP10 April 2021]*

Participants reported also sending patients to be seen in-person in COVID-19 clinics ('hot hubs') which helped them avoid unnecessary antibiotic prescribing over the telephone.

*Perhaps the fact that we've got the hot hub with the respiratory symptoms also helps us sort  
of, use that as a technique. (...) in a lot of situations we are able to say that we think that you  
need to be seen for that in which case to go to the hot hub. That kind of extra barrier, it does  
help us to reduce our antibiotic prescribing for respiratory symptoms and have those  
conversations around that and what's normal, what to do if things get worse and so on.  
[GP11 November 2020]*

Over time, improved access to COVID-19 testing and then COVID-19 vaccinations allowed the increase in-person consultations as the risk of face-to-face contact was perceived as lower.

### *Changing patient presentations and workload*

The number of patients and workload, types of presentations, and patient behaviours and expectations also seemed to influence antibiotic prescribing throughout the pandemic. Early in the pandemic participants described general practice as quiet, with routine care reduced and far fewer patients than usual contacting general practice (e.g., due to concerns about risk or thinking that surgeries were closed). Participants reported significantly increasing demand and workload in general practice since summer 2020 ('*an absolute deluge of work, just enormous quantities of work*' (GP06, November 2020)). This was described as due to the '*backlog*' of delayed issues, '*unmet need*', more work '*spilling over*' from reduced secondary and specialist services, increase in mental health issues, and, later, delivering COVID-19 vaccinations. The changing patient numbers, together with shifting ways of consulting, seemed to influence the fluctuations in the number of antibiotics prescribed.

*At the beginning, I would probably say we prescribed a lot less because we had so few  
contacts. People just weren't contacting us for a start. I'd say once contact increased, then  
we probably prescribed more because we didn't want to bring people in. Now most people  
are coming in, it's probably reduced again. [GP15 May 2021]*

The types of presentations also seemed to influence antibiotic prescribing. Initially, with the national lockdown, social distancing and school/nursery closures, participants reported having fewer patients with RTIs and, especially, far fewer children than typical. They accounted this to a lower spread of infections, better self-management, and more patients with RTIs/COVID-19 being seen in hot hubs.

*I have hardly seen any children at all since March which is a huge change as well. (...) I think  
a lot of it is because the majority of their infections are self-limiting illnesses (...) Also lots of  
the coughs, colds, fevers were being seen either in the COVID hubs or having COVID swabs  
and just staying at home, and so for that reason they didn't really need to see a GP. [GP14  
December 2020]*



On the other hand, earlier in the pandemic participants reported being more likely to prescribe antibiotics for patients with RTI symptoms and (suspected) COVID-19. Antibiotics were perceived to be a safer option early in the pandemic due to uncertainties around distinguishing COVID-19 from a bacterial RTI, lack of evidence on potential treatments for COVID-19, and COVID-19 guidelines (with antibiotics recommended in certain situations).

*...our local guidelines on the treatment of COVID was, if the symptoms didn't settle, then you would prescribe doxycycline so that was being prescribed. [GP02 October 2020]*

Later on, a few participants reported reducing their prescribing for COVID-19 as evidence emerged showing that antibiotics are ineffective for it.

Finally, there appeared to be mixed views about the impact of the pandemic on patients' behaviours and expectations for antibiotics. On the one hand, self-care and infection prevention behaviours might have improved due to the pandemic-related public health advice; on the other hand, there might have been little impact on patients' attitudes to antibiotics as COVID-19 was a viral infection.

*People have generally become more aware of infections and the way they spread and general things that they can do to try to avoid spreading of the infection, simple hygiene and so on. But I don't necessarily think that people have become more aware of antibiotics as such because obviously this is a viral pandemic and it's not a bacterial thing. I don't think that antibiotic stewardship has been particularly high on the media agenda. This is not really coming across in the news to people that that's an important thing to consider. [GP09 November 2020]*

Some patients were perceived as presenting later (e.g., after waiting for COVID-19 test results), others as contacting the surgery earlier than pre-pandemic, at the first onset of symptoms (e.g., because of easier online contact).

*Whereas previously trying to get hold of an appointment was difficult and therefore patient problems either self-resolved or they sought advice from elsewhere, for example seen a pharmacist, now they know they can just send in an e-Consult and then it's done, so we're getting patients presenting far, far earlier on. [GP17 June 2021]*

Some participants also felt there was still patient preference for antibiotics (with patients described as 'a lot happier' with 'a far lower threshold' for antibiotics), increasing the pressure on GPs to prescribe antibiotics.

*...lots of our patients don't want to go into [town] to the COVID hubs. It's a 45 minute journey so they just don't want to do it, so they do put us under quite a lot of pressure, I don't want to go that far, can't you just prescribe for me... [GP14 December 2020]*

### *Changing engagement with AMS strategies*

During the pandemic participants reported little engagement with AMS. Most reported a lack of discussions or initiatives related to antibiotics and AMS in practices, whereas a few described only discussing antibiotic prescribing in relation to COVID-19 and current guidelines. Participants also thought that the Clinical Commissioning Groups (CCGs; responsible for commissioning local health



services, including medicines management and AMS) suspended their usual AMS work with practices. For example, participants reported not having or not recalling the usual meetings with CCG prescribing advisors and/or no feedback on their antibiotic prescribing data.

*We had one meeting with a CCG pharmacist, (...) that would have been December and probably the next one was due in March or April and didn't happen. And in the meantime, our entire lives have been consumed with COVID planning and getting through the work.*  
[GP06 November 2020]

Participants expressed mixed views regarding whether and how different AMS strategies (that can be used to optimise antibiotic prescribing) were used and affected during the pandemic (Table 1). Some GPs described difficulties using particular strategies in remote consultations; e.g., communicating no need for antibiotics, or inability to use point-of-care C-Reactive Protein (CRP) testing. Others described adapting some strategies in remote consultations; e.g., sending links to patient leaflets or using clinical scores.

**Table 1. Views about the use of, and impact on, AMS strategies during the COVID-19 pandemic**

| AMS strategy                                              | Summary of views about use of, and impact on, AMS strategies during the COVID-19 pandemic                                                                                                                                                                                                                                                                                                                                                                                                                                                                                                                                                                                                                                                                                                                                                                                         |
|-----------------------------------------------------------|-----------------------------------------------------------------------------------------------------------------------------------------------------------------------------------------------------------------------------------------------------------------------------------------------------------------------------------------------------------------------------------------------------------------------------------------------------------------------------------------------------------------------------------------------------------------------------------------------------------------------------------------------------------------------------------------------------------------------------------------------------------------------------------------------------------------------------------------------------------------------------------|
| Communication strategies to explain prescribing decisions | <p>There were mixed views:</p> <ul style="list-style-type: none"> <li>• Some participants described no change in their communication with patients during the pandemic and remote consultations.</li> <li>• Others described that moving to remote consultations made them more focused on detailed history-taking and safety-netting due to lack of physical examination, and more focused on discussing patient concerns, expectations and understandings of normal/concerning symptoms.</li> </ul>                                                                                                                                                                                                                                                                                                                                                                             |
| Delayed/back-up prescriptions                             | <p>There were mixed views:</p> <ul style="list-style-type: none"> <li>• Some participants reported no change in their use of delayed/back-up prescriptions, compared to pre-pandemic (e.g., whether and when they used them, or not used them).</li> <li>• Some participants reported using delayed/back-up prescriptions less often, in favour of prescribing immediate antibiotics.</li> <li>• Others reported using more delayed/back-up prescriptions during the pandemic as a safety-net (especially with limited options to see the patient) or to limit re-consultations.</li> <li>• Participants described shifting to fully electronic prescribing (before and some since the pandemic); few perceived electronically-sent delayed/back-up prescriptions to be more difficult for patients to understand (e.g., rather than a post-dated paper prescription).</li> </ul> |
| Point-of-care C-Reactive Protein (CRP) testing            | <ul style="list-style-type: none"> <li>• Participants reported not being able to use the point-of-care testing equipment due to lack of, and limited, face-to-face contact.</li> <li>• Some thought that it could/might be useful for face-to-face consultations, e.g., when they become safer and more frequent again.</li> </ul>                                                                                                                                                                                                                                                                                                                                                                                                                                                                                                                                                |

|                                                       |                                                                                                                                                                                                                                                                                                                                                                                                                                                                                                                                                                                                                                                                  |
|-------------------------------------------------------|------------------------------------------------------------------------------------------------------------------------------------------------------------------------------------------------------------------------------------------------------------------------------------------------------------------------------------------------------------------------------------------------------------------------------------------------------------------------------------------------------------------------------------------------------------------------------------------------------------------------------------------------------------------|
|                                                       | <ul style="list-style-type: none"> <li>Some speculated how point-of-care CRP testing could be implemented in the future; e.g., in pharmacies, by triaging patients to have the test, by non-GP clinicians.</li> </ul>                                                                                                                                                                                                                                                                                                                                                                                                                                            |
| Patient leaflets                                      | <ul style="list-style-type: none"> <li>Most participants reported an increased sharing of patient information due to being able to text links to leaflets/websites to patients, and becoming more used to this system function.</li> <li>Some reported not giving out (printed) leaflets due to lack of/limited in-person contact.</li> </ul>                                                                                                                                                                                                                                                                                                                    |
| Guidelines                                            | <ul style="list-style-type: none"> <li>Participants reported following prescribing guidelines as a strategy to ensure appropriate antibiotic prescribing, and many reported and that it remained unchanged during the pandemic.</li> <li>Some referred to following COVID-19 guidelines in relation to deciding about antibiotics for patients with (suspected) COVID-19.</li> </ul>                                                                                                                                                                                                                                                                             |
| Clinical scores or templates (e.g. Centor, FeverPAIN) | <p>Some reported using and adapting clinical scores/templates for the new ways of consulting during the pandemic, e.g.:</p> <ul style="list-style-type: none"> <li>Using algorithms as part of the triage process (e.g., to identify potential infections, sepsis or COVID-19).</li> <li>Using FeverPAIN and/or Centor in remote consultations as part of an assessment with slight adaptations, e.g., instead of making observations in a physical examination, they would ask patients about these (e.g., fever, swollen glands), ask to see their throat in a video or picture, or ask a relative to look at the patient's throat and describe it.</li> </ul> |

### Shifting priorities

Participants described how their priorities changed during the pandemic, which linked and overlapped with the changes described above. Early on, reducing COVID-19 transmission, and protecting staff and patients took precedence. Over time, the priority and planning related to safely restoring face-to-face contact, adapting to new workflows (with remote and in-person appointments), dealing with the increasing demand/workload, and delivering vaccinations. Consequently, AMS was not perceived a priority during the pandemic, even after the initial, emergency period. It was perceived as less urgent, at least until the other priorities were addressed.

*At the moment, [AMS] is not a priority. We're overwhelmed with work and we've not got enough staff... And to do things proactively just now where they're not directly impacting on our day to day work is really difficult to do. There are so many other priorities that we've got to try and keep the services running, and I suspect a lot of practices feel the same, that they're struggling to keep services going, deliver the vaccine clinics, and deal with the unmet needs. And where something is not as immediate as that (...) there isn't the capacity to do things... that don't have that priority just now. And I'm afraid antibiotic prescribing is one of them. As is a whole lot of other prescribing to be honest with you. [GP08 May 2021]*

While participants recognized the importance of AMS and re-engaging with it, they described no plans for it and many uncertainties as impeding their planning. They suggested it would be useful for the CCGs to return to their usual AMS work (e.g., providing feedback on prescribing, incentives).

*We don't have any plans as a practice as such at the moment but we tend to respond very well to the [CCG] Medicines Optimisation Team's strategies that they send out every now and then. So they run a prescribing quality scheme every year, which has actually been deferred this year because of COVID (...) there's a possibility it won't restart till next April but that tends to be the main driver for us in terms of affecting our prescribing habits. [GP09 May 2021]*

Some planning seemed to relate to finding ways to manage the new ways of consulting and working, and increased demand and workload. Telephone triage and remote consultations were perceived to be continued, and participants described the need to identify the optimal proportions and processes for remote and in-person consultations. Few participants reported expanding their teams with additional staff, especially non-GP clinicians, to help manage the workload and acute infections. Some described these changes as potential opportunities for improving the management of infections and workload, and antibiotic prescribing in the future; e.g., for triaging patients to acute infections teams (rather than directly to GPs) or for implementing point-of-care CRP testing.

*Starting with telephone and video consultations opens up a much more, a much smoother pathway for doctors to start thinking about, and the [Healthcare Assistant] led step path after that so, i.e. we can have a quick conversation, take the history, take the concerns, take the ideas, and then tell people to come in and see someone, see an HCA for the necessary observations and tests. [GP11 November 2020]*

## 4. Discussion

We found that GPs in England perceived and experienced a considerable and changing impact of the COVID-19 pandemic on how they managed infections, prescribed antibiotics and engaged with AMS. They perceived that their threshold for prescribing antibiotics (particularly for RTIs) decreased early in the pandemic, influenced by moving to remote consultations without physical examination, and ambiguities related to treating patients with (suspected) COVID-19. Both factors increased GPs' clinical uncertainty and perception that prescribing antibiotics was a safer option than not prescribing. While the likelihood of prescribing antibiotics for RTI symptoms seemed higher, fewer patients presenting in general practice meant that the overall number of prescriptions issued was not necessarily expected to be higher than pre-pandemic. Over the subsequent months, and especially after the lockdown, participants perceived their approach to antibiotic prescribing as returning to 'normal' (pre-pandemic). This was linked to gradually increasing in-person consultations and examination, increasing patient numbers, and emerging evidence that antibiotics offer no benefit for COVID-19 (34–36). Prudent antibiotic prescribing and AMS were not considered a priority during the first year of the pandemic, even after the emergency phase, overshadowed by more urgent priorities. A return of CCG AMS work and considering opportunities for new ways of working and managing infections were suggested as part of future AMS.

Participants' perceptions about the impact on antibiotic prescribing confirmed and added nuance to the analyses of prescribing data. We identified two distinct impacts early in the pandemic: (i) a greater tendency to prescribe antibiotics (mostly due to clinical uncertainties and need to safety-net), and (ii) fewer consultations and thus fewer prescriptions for RTIs (mostly due to reduced transmission and/or patients delaying or avoiding contact with general practices). Our findings are in line with the analysis showing that when taking into account a decreased number of appointments,

the number of prescriptions was 6.7% higher than expected (18). They are also supported by the analysis showing that March 2020 was associated with higher antibiotic prescribing, followed by lower rates than predicted between April and August 2020 (20), while the incidence of RTIs decreased (particularly in April 2020) (20,37). Although participants described having a '*lower threshold*' for prescribing antibiotics (which may suggest that some were of little/no benefit), it is possible that these prescriptions were appropriate and influenced by patients' presentations (e.g., higher threshold for consulting, presenting later, access issues). It is also possible that too few antibiotics were prescribed (e.g., considering a peak in community-acquired bloodstream infections in May 2020 (38)). Therefore, considering these fluctuations (including the numbers of prescriptions and consultations) when interpreting changes in antibiotic prescribing during the pandemic is needed (19,21–23). Investigating the appropriateness of antibiotic prescribing against guidelines, antibiotic prescribing in COVID-19/hot hubs, and patients' help-seeking and self-management behaviours would also provide helpful insights.

In this study we identified influences experienced by the GPs to explain these fluctuations in prescribing. The major factor that seemed to increase the likelihood of prescribing early in the pandemic involved shifting to remote consultations and managing (new) risks to staff and patients. A mixed-methods study found a rapid move to 90% remote GP consultations by April 2020 (decreasing in the following months) and GPs' concerns about clinical risk and safe thresholds for seeing patients face-to-face (39). Similarly, a qualitative study across eight European countries, including the UK, found the changes in managing patients with RTIs, and remote care and dealing with uncertainty among the most salient experiences of the transformation of primary care during the pandemic (40). Pre-pandemic evidence on the impact of remote consultations on antibiotic prescribing in primary care is inconclusive (41). Future research needs to consider the longer-term impact of remote consulting and the pandemic as related but also separate issues. We found that over time GPs shifted to using asynchronous and mixed-mode consultations (i.e., gathering and reviewing information on symptoms, a telephone consultation, and a decision on whether a face-to-face appointment is needed) – this was perceived as helpful and enabling a more usual approach to prescribing.

We also found that dealing with an increasing workload was a major concern and priority, which additionally impeded the engagement with AMS. Increasing consultations and other professional responsibilities leading to unmanageable workload were a major issue in the UK general practice long before the pandemic (42,43), and insufficient time was perceived as one of the main barriers to CCG and general practice professionals engaging with AMS pre-pandemic (44). In order to support prudent antibiotic prescribing and engagement with AMS, it is important to devise optimal ways of working and managing demand and workloads in primary care. These issues are also relevant to other types of prescribing and quality improvement.

During the COVID-19 pandemic GPs and CCGs focused on priorities seen as more urgent than AMS. As part of the STEP-UP study we also interviewed CCG professionals responsible for AMS in general practices who also reported decreased focus on AMS during the pandemic and intentions to re-prioritise AMS (unpublished data). Similarly, there was a negative impact of COVID-19 on routine AMS activities in hospitals (9). Pre-pandemic (and as found in this study), AMS in general practices largely depended on the engagement of CCG prescribing advisors, mostly with strategies such as prescribing targets, feedback and incentives (44). Our participants suggested that re-engagement of

CCGs with, and return to, promoting/use of AMS strategies (starting with audits and feedback) is essential to bring antibiotic prescribing into focus again.

Existing AMS strategies can be adapted to, or repurposed for, use in the context of COVID-19 (12). Currently, we need to better understand how AMS strategies may fit in, or be adapted to, the post-pandemic primary care. Some GPs perceived the pandemic as creating opportunities to rethink and reorganise the management of acute infections in primary care. This may help consider AMS a part of processes for improving infection management, patient outcomes and safety, rather than as a separate initiative. New approaches might involve, e.g., more non-GP clinicians and acute/minor infections teams as the first or primary point of contact for non-vulnerable patients with acute infections; or a wider use of point-of-care testing for RTIs to guide antibiotic prescribing (45,46).

### *Limitations*

Due to the rapid nature of the pandemic, we adapted and extended an existing study to explore the impact of COVID-19 on AMS. This led to some limitations. To ensure prompt recruitment, we used convenience sampling, including participants in the STEP-UP study (focused on implementation of AMS strategies) and others who expressed interest. Although the views of participants from the STEP-UP study and additional GPs did not seem to differ, participants' views might have still differed from non-participants. Our aim was to capture change over time. However, most change took place at the start of the pandemic before we conducted the first round of interviews. Thus, the findings related to the initial pandemic phase rely on recollections and may be subject to a recall bias and reinterpretation. Most participants were from one Clinical Research Network area; GPs in other areas of England or countries might have reported different views and experiences. As with all qualitative studies, the findings are time- and context-specific.

### *Implications*

The main implications of this study relate to the need to resume AMS activities in primary care and adapt them to the post-pandemic models of care. Prioritizing AMS requires addressing other issues, such as finding ways to manage the increased workload or appropriate mix of remote and in-person consultations. Most immediately, CCGs need to resume AMS work to drive re-focusing on, and reinforcing, the importance of prudent antibiotic prescribing and AMS; for example, reviving prescribing data feedback, audits and meetings to discuss prescribing data and targets. Longer-term, AMS will need to fit within the post-pandemic primary care model/delivery. This will likely involve much higher levels of triage and non-face-to-face consulting than pre-pandemic, including a mix of asynchronous (e-consults) and synchronous (telephone/video calls) consulting. It might also involve new workflows and health professionals. Thus, we need to exploit the learning from the pandemic and identify further useful adaptations. For example, we learnt that some AMS strategies can be slightly adapted to be used with triage and remotely (e.g., leaflets, clinical scores, delayed/back-up prescriptions). Our findings also highlighted opportunities, created by the disruption of the pandemic, for improving the management of acute infections. For example, opportunities to rethink and reorganize workflows (e.g., triage, mixed-mode consultations), and potential/planned increases in team-based approaches (e.g., with minor/acute infection teams, non-GP clinicians). Such changes will also require more focus on consistent, practice-based approach to managing infections and prescribing. Other opportunities may involve the promotion of infection prevention measures, self-

care, and pharmacy-based services (e.g., with advice, leaflets and/or point-of-care testing). More research needs to identify how to best implement different AMS strategies and optimally manage acute infections in the post-pandemic context. It also needs to identify the longer-term impact of the remote/mixed-mode consulting on infection management and prescribing thresholds. Better understanding of (changing) patients' help-seeking and self-management behaviours, and their views on antibiotics (during and especially as we are coming out of the pandemic) is also important.

## Supplementary Materials

Supplementary Material 1. Interview topic guides

Supplementary Material 2. Additional quotes supporting the findings

## Author Contributions

Conceptualization: A.J.B.; S.T.C.; M.M.; A.C.; A.S.W.; methodology: A.J.B.; S.T.C.; M.M.; A.C.; data collection: A.J.B.; data analysis: A.J.B.; K.M.; writing—original draft preparation: A.J.B.; writing—review and editing: S.T.C.; M.M.; A.C.; K.M.; B.H.; C.C.B.; L.M.; L.R.; A.H.; supervision: S.T.C.; M.M.; project administration: A.J.B.; funding acquisition: A.S.W.; S.T.C.; M.M.; C.C.B.; A.H.; B.H.; L.R. All authors have read and agreed to the published version of the manuscript.

## Funding

This research was funded by the Economic and Social Research Council (ESRC) through the Antimicrobial Resistance Cross Council Initiative supported by the seven research councils in partnership with other funders (grant number: ES/P008232/1). It was also supported by the National Institute for Health Research (NIHR) Health Protection Research Unit (HPRU) in Healthcare Associated Infections and Antimicrobial Resistance at the University of Oxford and Imperial College London in partnership with Public Health England, the NIHR Oxford Biomedical Research Centre, and the NIHR under the Applied Health Research (ARC) programme for North West London. The support of the funders is gratefully acknowledged. CCB, AH and ASW are NIHR Senior Investigators.

The funders had no influence on the design of the study, data collection, analysis and interpretation of the findings. The views expressed in this publication are those of the authors and not necessarily those of the NHS, the NIHR, the Department of Health and Social Care or the National Institute for Health Protection (Public Health England).

## Institutional Review Board Statement

The study was conducted according to the guidelines of the Declaration of Helsinki. It was reviewed and approved by the University of Oxford Medical Sciences Inter-Divisional Research Ethics Committee (ref. R59812) and the NHS Health Research Authority (ref. 19/HRA/0434).

## Informed Consent Statement

Informed consent was obtained from all participants involved in the study (verbally, followed by written records of consent).

## Data Availability Statement

The data presented in this study are available on request from the corresponding author. Additional data (quotes) supporting the findings are available in Supplementary Material 2.

## Acknowledgments

This paper is part of the work of the STEP-UP study team comprising: Philip E. Anyanwu, Aleksandra J. Borek, Nicole Bright, James Buchanan, Christopher C. Butler, Anne Campbell, Ceire Costelloe, Benedict Hayhoe, Alison Holmes, Susan Hopkins, Azeem Majeed, Monsey Mcleod, Michael Moore, Liz Morrell,



Koen B. Pouwels, Julie V. Robotham, Laurence S. J. Roope, Sarah Tonkin-Crine, Ann Sarah Walker, Sarah Wordsworth, Carla Wright, Sara Yadav, Anna Zalevski.

We thank the general practitioners for participating in the study. We also acknowledge, and thank for, the support with recruitment of the National Institute for Health Research Clinical Research Network.

## Conflicts of Interest

B.H. works for eConsult, a provider of asynchronous consultations in primary, secondary, and urgent/emergency care. Other authors declare no conflict of interest.

## References

1. World Health Organization. Global action plan on AMR. Geneva: World Health Organization; 2015. Available from: <http://www.who.int/antimicrobial-resistance/global-action-plan/en/>
2. Department of Health and Social Care. UK 5-year action plan for antimicrobial resistance 2019 to 2024. London: Department of Health and Social Care; 2019. Available from: <https://www.gov.uk/government/publications/uk-5-year-action-plan-for-antimicrobial-resistance-2019-to-2024>
3. Public Health England. English surveillance programme for antimicrobial utilisation and resistance (ESPAUR) report 2019 to 2020. 2020. Available from: <https://www.gov.uk/government/publications/english-surveillance-programme-antimicrobial-utilisation-and-resistance-espaur-report>
4. Karami Z, Knoop BT, Dofferhoff ASM, Blaauw MJT, Janssen NA, van Apeldoorn M, et al. Few bacterial co-infections but frequent empiric antibiotic use in the early phase of hospitalized patients with COVID-19: results from a multicentre retrospective cohort study in The Netherlands. *Infect Dis.* 2021 Feb 1;53(2):102–10.
5. Rawson TM, Moore LSP, Zhu N, Ranganathan N, Skolimowska K, Gilchrist M, et al. Bacterial and Fungal Coinfection in Individuals With Coronavirus: A Rapid Review To Support COVID-19 Antimicrobial Prescribing. *Clin Infect Dis.* 2020 Nov 1;71(9):2459–68.
6. Townsend L, Hughes G, Kerr C, Kelly M, O'Connor R, Sweeney E, et al. Bacterial pneumonia coinfection and antimicrobial therapy duration in SARS-CoV-2 (COVID-19) infection. *JAC-Antimicrob Resist.* 2020 Sep 1;2(3).
7. Vaughn VM, Gandhi TN, Petty LA, Patel PK, Prescott HC, Malani AN, et al. Empiric Antibacterial Therapy and Community-onset Bacterial Coinfection in Patients Hospitalized With Coronavirus Disease 2019 (COVID-19): A Multi-hospital Cohort Study. *Clin Infect Dis.* 2021 May 15;72(10):e533–41.
8. Cong W, Poudel AN, Alhusein N, Wang H, Yao G, Lambert H. Antimicrobial Use in COVID-19 Patients in the First Phase of the SARS-CoV-2 Pandemic: A Scoping Review. *Antibiotics.* 2021 Jun;10(6):745.
9. Ashiru-Oredope D, Kerr F, Hughes S, Urch J, Lanzman M, Yau T, et al. Assessing the Impact of COVID-19 on Antimicrobial Stewardship Activities/Programs in the United Kingdom. *Antibiotics.* 2021 Feb;10(2):110.
10. Miranda C, Silva V, Capita R, Alonso-Calleja C, Igrejas G, Poeta P. Implications of antibiotics use during the COVID-19 pandemic: present and future. *J Antimicrob Chemother.* 2020 Dec 1;75(12):3413–6.
11. Khor WP, Olaoye O, D'Arcy N, Krockow EM, Elshenawy RA, Rutter V, et al. The Need for Ongoing Antimicrobial Stewardship during the COVID-19 Pandemic and Actionable Recommendations. *Antibiotics.* 2020 Dec;9(12):904.
12. Mazdeyasna H, Nori P, Patel P, Doll M, Godbout E, Lee K, et al. Antimicrobial Stewardship at the Core of COVID-19 Response Efforts: Implications for Sustaining and Building Programs. *Curr Infect Dis Rep.* 2020;22(9):23.

13. Monnet DL, Harbarth S. Will coronavirus disease (COVID-19) have an impact on antimicrobial resistance? *Eurosurveillance*. 2020 Nov 12;25(45):2001886.
14. Subramanya SH, Czyż DM, Acharya KP, Humphreys H. The potential impact of the COVID-19 pandemic on antimicrobial resistance and antibiotic stewardship. *VirusDisease*. 2021 May 25;1–8.
15. Rawson TM, Ming D, Ahmad R, Moore LSP, Holmes AH. Antimicrobial use, drug-resistant infections and COVID-19. *Nat Rev Microbiol*. 2020 Aug;18(8):409–10.
16. Rawson TM, Moore LSP, Castro-Sanchez E, Charani E, Davies F, Satta G, et al. COVID-19 and the potential long-term impact on antimicrobial resistance. *J Antimicrob Chemother*. 2020 Jul 1;75(7):1681–4.
17. Rodríguez-Baño J, Rossolini GM, Schultsz C, Tacconelli E, Murthy S, Ohmagari N, et al. Key considerations on the potential impacts of the COVID-19 pandemic on antimicrobial resistance research and surveillance. *Trans R Soc Trop Med Hyg*. 2021 Oct 1;115(10):1122–9.
18. Armitage R, Nellums LB. Antibiotic prescribing in general practice during COVID-19. *Lancet Infect Dis*. 2021 Jun 1;21(6):e144.
19. Hussain AZ, Paudyal V, Hadi MA. Impact of the COVID-19 Pandemic on the Prescribing Patterns of First-Line Antibiotics in English Primary Care: A Longitudinal Analysis of National Prescribing Dataset. *Antibiotics*. 2021 May;10(5):591.
20. Rezel-Potts E, L'Esperance V, Gulliford MC. Antimicrobial stewardship in the UK during the COVID-19 pandemic: a population-based cohort study and interrupted time-series analysis. *Br J Gen Pract*. 2021 May 1;71(706):e331–8.
21. Andrews A, Budd EL, Hendrick A, Ashiru-Oredope D, Beech E, Hopkins S, et al. Surveillance of Antibacterial Usage during the COVID-19 Pandemic in England, 2020. *Antibiotics*. 2021 Jul;10(7):841.
22. Zhu NJ, McLeod M, McNulty CAM, Lecky DM, Holmes AH, Ahmad R. Trends in Antibiotic Prescribing in Out-of-Hours Primary Care in England from January 2016 to June 2020 to Understand Behaviours during the First Wave of COVID-19. *Antibiotics*. 2021 Jan;10(1):32.
23. Zhu N, Aylin P, Rawson T, Gilchrist M, Majeed A, Holmes A. Investigating the impact of COVID-19 on primary care antibiotic prescribing in North West London across two epidemic waves. *Clin Microbiol Infect*. 2021 May 1;27(5):762.
24. Malcolm W, Seaton RA, Haddock G, Baxter L, Thirlwell S, Russell P, et al. Impact of the COVID-19 pandemic on community antibiotic prescribing in Scotland. *JAC-Antimicrob Resist*. 2020;2(4):dlaa105.
25. Girvin B, Hsia Y, Turner W. Antimicrobial stewardship in Northern Ireland during COVID-19. *Prescriber*. 2021;32(4):15–20.
26. van de Pol AC, Boeijen JA, Venekamp RP, Platteel T, Damoiseaux RAMJ, Kortekaas MF, et al. Impact of the COVID-19 Pandemic on Antibiotic Prescribing for Common Infections in The Netherlands: A Primary Care-Based Observational Cohort Study. *Antibiotics*. 2021 Feb;10(2):196.

27. Peñalva G, Benavente RS, Pérez-Moreno MA, Pérez-Pacheco MD, Pérez-Milena A, Murcia J, et al. Effect of the coronavirus disease 2019 pandemic on antibiotic use in primary care. *Clin Microbiol Infect.* 2021 Jul 1;27(7):1058–60.
28. Silva TM, Estrela M, Gomes ER, Piñeiro-Lamas M, Figueiras A, Roque F, et al. The Impact of the COVID-19 Pandemic on Antibiotic Prescribing Trends in Outpatient Care: A Nationwide, Quasi-Experimental Approach. *Antibiotics.* 2021;10(9):1040.
29. Gillies MB, Burgner DP, Ivancic L, Nassar N, Miller JE, Sullivan SG, et al. Changes in antibiotic prescribing following COVID-19 restrictions: Lessons for post-pandemic antibiotic stewardship. *Br J Clin Pharmacol.* 2021 Aug 17.
30. O'Brien BC, Harris IB, Beckman TJ, Reed DA, Cook DA. Standards for Reporting Qualitative Research: A Synthesis of Recommendations. *Acad Med.* 2014 Sep;89(9):1245–51.
31. STEP-UP study: Improving the uptake and SusTainability of Effective interventions to promote Prudent antibiotic Use in Primary care. Available from: <https://www.expmndm.ox.ac.uk/step-up>
32. Grosseohme D, Lipstein E. Analyzing longitudinal qualitative data: the application of trajectory and recurrent cross-sectional approaches. *BMC Res Notes.* 2016 Mar 2;9.
33. Braun V, Clarke V. Using thematic analysis in psychology. *Qual Res Psychol.* 2006;3(2):77–101.
34. The National Institute for Health and Care Excellence (NICE). COVID-19 rapid guideline: Managing COVID-19. NICE; 2021.
35. Butler CC, Dorward J, Yu L-M, Gbinigie O, Hayward G, Saville BR, et al. Azithromycin for community treatment of suspected COVID-19 in people at increased risk of an adverse clinical course in the UK (PRINCIPLE): a randomised, controlled, open-label, adaptive platform trial. *The Lancet.* 2021 Mar 20;397(10279):1063–74.
36. Butler CC, Yu L-M, Dorward J, Gbinigie O, Hayward G, Saville BR, et al. Doxycycline for community treatment of suspected COVID-19 in people at high risk of adverse outcomes in the UK (PRINCIPLE): a randomised, controlled, open-label, adaptive platform trial. *Lancet Respir Med.* 2021 Sep 1;9(9):1010–20.
37. Lusignan S de, Joy M, Sherlock J, Tripathy M, Hecke O van, Gbinigie K, et al. PRINCIPLE trial demonstrates scope for in-pandemic improvement in primary care antibiotic stewardship: a retrospective sentinel network cohort study. *BJGP Open.* 2021 Oct 1;5(5).
38. Zhu N, Rawson TM, Mookerjee S, Price JR, Davies F, Otter J, et al. Changing patterns of bloodstream infections in the community and acute care across two COVID-19 epidemic waves: a retrospective analysis using data linkage. *Clin Infect Dis Off Publ Infect Dis Soc Am.* 2021 Oct 1;ciab869.
39. Murphy M, Scott LJ, Salisbury C, Turner A, Scott A, Denholm R, et al. Implementation of remote consulting in UK primary care following the COVID-19 pandemic: a mixed-methods longitudinal study. *Br J Gen Pract.* 2021 Mar 1;71(704):e166–77.
40. Wanat M, Hoste M, Gobat N, Anastasaki M, Boehmer F, Chlabicz S, et al. Transformation of primary care during the COVID-19 pandemic: experiences of healthcare professionals in eight European countries. *Br J Gen Pract.* 2021;71(709):e634.

41. Han SM, Greenfield G, Majeed A, Hayhoe B. Impact of Remote Consultations on Antibiotic Prescribing in Primary Health Care: Systematic Review. *J Med Internet Res*. 2020 Nov 9;22(11):e23482.
42. Hobbs FDR, Bankhead C, Mukhtar T, Stevens S, Perera-Salazar R, Holt T, et al. Clinical workload in UK primary care: a retrospective analysis of 100 million consultations in England, 2007–14. *The Lancet*. 2016 Jun 4;387(10035):2323–30.
43. Croxson CH, Ashdown HF, Hobbs FR. GPs' perceptions of workload in England: a qualitative interview study. *Br J Gen Pract*. 2017 Feb 1;67(655):e138–47.
44. Borek AJ, Anthierens S, Allison R, McNulty CAM, Lecky DM, Costelloe C, et al. How did a Quality Premium financial incentive influence antibiotic prescribing in primary care? Views of Clinical Commissioning Group and general practice professionals. *J Antimicrob Chemother*. 2020;75(9):2681–8.
45. Thornton HV, Khalid T, Hay AD. Point-of-care testing for respiratory infections during and after COVID-19. *Br J Gen Pract*. 2020 Dec 1;70(701):574–5.
46. Pink I, Raupach D, Fuge J, Vonberg R-P, Hoepfer MM, Welte T, et al. C-reactive protein and procalcitonin for antimicrobial stewardship in COVID-19. *Infection*. 2021 Oct 1;49(5):935–43.
